# Supplementary material for: Mouse Genetic Analysis of Bone Marrow Stem Cell Niches: Technological Pitfalls, Challenges, and Translational Considerations
Source: PubMed Central journal article supplement — Stem Cell Reports. 2017 Oct 19;9(5):1343–58. doi: 10.1016/j.stemcr.2017.09.014 (PMC5829346; doi:10.1016/j.stemcr.2017.09.014), 2017-10-19
Supplement: mmc1.pdf [file mmc1.pdf]

**Stem Cell Reports, Volume 9**

**Supplemental Information**

**Mouse Genetic Analysis of Bone Marrow Stem Cell Niches: Technological Pitfalls, Challenges, and Translational Considerations**

**Kevin G. Chen, Kory R. Johnson, and Pamela G. Robey**

**Table S1. Developmental Stage-Related Marker Gene Expression in Bone Marrow Stem Cell Lineages: Conditions and Constrains in Murine Models**

| Stages               | Mouse strains/cells                                 | Major findings & descriptions                                                                                                                                                                                                                                                                                                                                           | CFU -F | Authors' comments                                                                                                                                                                                                                                                  | References               |
|----------------------|-----------------------------------------------------|-------------------------------------------------------------------------------------------------------------------------------------------------------------------------------------------------------------------------------------------------------------------------------------------------------------------------------------------------------------------------|--------|--------------------------------------------------------------------------------------------------------------------------------------------------------------------------------------------------------------------------------------------------------------------|--------------------------|
| E8.5-, E10.5-, E18.5 | <i>Nes-CreER<sup>T2</sup></i> : RCE-loxP            | Tamoxifen induction at E8.5 & E10.5, chase to E18.5: <i>Nes-Cre<sup>+</sup></i> cells, not found in proliferating and hypertrophic chondrocytes, infiltrate over osteochondral junction and into the trabecular bone.                                                                                                                                                   | 0.8%   | BM <i>Nes-Cre<sup>+</sup></i> cells do not contribute to fetal endochondrogenesis.                                                                                                                                                                                 | (Isern et al., 2014)     |
| E9.5                 | <i>Sox10-CreER<sup>T2</sup></i>                     | Among 18% of <i>Sox10-Cre<sup>+</sup></i> cells, 72% of them were <i>Nes-GFP<sup>+</sup>/PDGFR<math>\alpha</math><sup>+</sup></i> cells.                                                                                                                                                                                                                                | NA     | Evidence of <i>Nes-GFP<sup>+</sup></i> cells' neural crest association                                                                                                                                                                                             | (Isern et al., 2014)     |
| E10.5                | <i>Nes-GFP<sup>+</sup>/CD31<sup>+</sup></i> cells   | Represent 8% of endothelial cells at limb buds                                                                                                                                                                                                                                                                                                                          | NA     | Appeared at the endochondral condensation stage                                                                                                                                                                                                                    | (Ono et al., 2014)       |
| E11.5                | <i>Nes-GFP<sup>+</sup>/CD31<sup>+</sup></i> cells   | Observed at the perichondrium                                                                                                                                                                                                                                                                                                                                           | NA     | <i>Nes-GFP<sup>+</sup></i> cells are rarely found within the mesenchymal condensation region.                                                                                                                                                                      | (Ono et al., 2014)       |
| E11.5-P0, P21        | <i>Nes-CreER<sup>T2</sup></i> : Rosa26 tomato       | Tamoxifen induction (from E11.5) before the formation the POC and chase to P0 and P21: only few <i>Nes-Cre<sup>+</sup></i> cells found in bone at P0 and P21                                                                                                                                                                                                            | NA     | After the POC, <i>Nes-Cre<sup>+</sup></i> cells do not commit to neonatal and postnatal bone development.                                                                                                                                                          | (Ono et al., 2014)       |
| E12.5                | <i>Nes-GFP<sup>+</sup>/CD31<sup>-</sup></i> cells   | 1 <sup>st</sup> appearance at the perichondrium                                                                                                                                                                                                                                                                                                                         | NA     | None                                                                                                                                                                                                                                                               | (Ono et al., 2014)       |
| E13.5                | <i>Nes-GFP<sup>+</sup>/CD31<sup>+/-</sup></i> cells | <ul style="list-style-type: none"> <li>▶ Overlap with <i>Col2<sup>+</sup></i> cells at the perichondrium</li> <li>▶ Some <i>Nes-GFP<sup>+</sup></i> cells are likely derived from collagen II-expressing (chondrogenic) cells.</li> <li>▶ Perichondral <i>Nes-GFP<sup>+</sup>CD31<sup>+/-</sup></i> cells are regulated by both <i>lhh</i> and <i>Runx2</i>.</li> </ul> | NA     | <i>Nes-GFP<sup>+</sup>/CD31<sup>-</sup></i> non-endothelial cells become osteoprogenitor cells upon <i>lhh</i> and <i>Runx2</i> induction.                                                                                                                         | (Ono et al., 2014)       |
| E13.5                | <i>Nes-CreER<sup>T2</sup></i> : RCE-loxP            | Similar to <i>Nes-GFP<sup>+</sup></i> cells: detected near the chondral-perichondral interface and the osteo-chondral junction                                                                                                                                                                                                                                          | NA     | Consistent with the dynamic nature of <i>Nes-GFP<sup>+</sup></i> cells                                                                                                                                                                                             | (Isern et al., 2014)     |
| E13.5-P0, P21        | <i>Nes-CreER<sup>T2</sup></i> : Rosa26 tomato       | Tamoxifen induction and chase from E13.5: only few <i>Nes-Cre<sup>+</sup></i> cells found in bone at P0 and P21                                                                                                                                                                                                                                                         | NA     | After the POC, <i>Nes-Cre<sup>+</sup></i> cells do not commit to neonatal and postnatal bone development.                                                                                                                                                          | (Ono et al., 2014)       |
| E14.5                | <i>Nes-GFP<sup>+</sup>/CD31<sup>+/-</sup></i> cells | Both types of <i>Nes<sup>+</sup></i> cells occupied at the inner perichondrium, with <i>Nes-GFP<sup>+</sup>/CD31<sup>-</sup></i> cells aligned on the innermost portion.                                                                                                                                                                                                | NA     | None                                                                                                                                                                                                                                                               | (Ono et al., 2014)       |
| E15.5                | <i>Nes-GFP<sup>+</sup>/CD31<sup>+/-</sup></i> cells | <ul style="list-style-type: none"> <li>▶ Infiltrate into the cartilage template along vascular invasion</li> <li>▶ Increase in <i>Nes-GFP<sup>+</sup>/CD31<sup>+/-</sup></i> cell numbers</li> <li>▶ <i>Nes-GFP<sup>+</sup>CD31<sup>+/-</sup></i> closely associated at the POC</li> </ul>                                                                              | NA     | <i>Nes-GFP<sup>+</sup>/CD31<sup>+</sup></i> cells show (at least 3-fold) stronger GFP signals than <i>Nes-GFP<sup>+</sup>/CD31<sup>-</sup></i> cells at E15.5, suggesting that <i>Nes-GFP</i> transcription is positively regulated by endothelial cell signaling. | (Ono et al., 2014)       |
| E15.5                | <i>Lepr-Cre</i>                                     | Absence of <i>Lepr-Cre<sup>+</sup></i> cells at the POC at this stage                                                                                                                                                                                                                                                                                                   |        | <i>Nes-GFP<sup>+</sup></i> and <i>Osx-Cre<sup>+</sup></i> emerged in the POC                                                                                                                                                                                       | (Mizoguchi et al., 2014) |
| E15.5                | <i>Nes-creER<sup>T2</sup></i> : iDTR mice           | Deletion of <i>Nes-Cre<sup>+</sup></i> cells in this double transgenic mice resulted in 4-fold decrease in HSC activity in fetal BM within 48 hours, concomitantly with 8-fold increase in HSCs in fetal liver                                                                                                                                                          | NA     | These data suggest that <i>Nes-GFP</i> transcriptome positively regulates the migration of HSC niches from the embryonic liver to the BM.                                                                                                                          | (Isern et al., 2014)     |
| E16.5-P7, P21        | <i>Nes-CreER<sup>T2</sup></i> : Rosa26 tomato       | Tamoxifen induction at E16.5, the time that the marrow space starts to form, and chase to P7 and P21: see larger numbers of <i>Nes-Cre<sup>+</sup></i> in bone                                                                                                                                                                                                          | 0.3%   | <i>Nes-CreER</i> transcription is repressed before the formation of POC, but derepressed after the formation of the POC and marrow cavity.                                                                                                                         | (Ono et al., 2014)       |
| E17.5                | <i>Lepr-Cre<sup>+</sup></i> cells                   | <ul style="list-style-type: none"> <li>▶ 1<sup>st</sup> appearance of <i>Lepr-Cre<sup>+</sup></i> cells</li> <li>▶ Found in the primary spongiosa and the periosteum</li> </ul>                                                                                                                                                                                         | NA     | <i>Lepr-Cre<sup>+</sup></i> cells in the periosteum might be originated from <i>Nes-GFP<sup>+</sup>/CD31<sup>+/-</sup></i> cells as described by Ono et al. 2014.                                                                                                  | (Mizoguchi et al., 2014) |
| E17.5                | <i>Nes-GFP<sup>+</sup></i> cells                    | Display 3-fold lower CFU-Fs than <i>Nes-GFP<sup>-</sup></i> cells, but higher capacity to form "mesospheres"                                                                                                                                                                                                                                                            | 0.1%   | Higher SCC potential in <i>Nes-GFP<sup>+</sup></i> cells than <i>Nes-GFP<sup>-</sup></i> cells                                                                                                                                                                     | (Isern et al., 2014)     |

|                      |                                                                 |                                                                                                                                                                                                                                                                                                                                                                                                                                                                                                                                                                                                                                                                                                                                                                                                         |      |                                                                                                                                                                                                                                                                                                                                                                                                                                                                                                                                                 |                      |
|----------------------|-----------------------------------------------------------------|---------------------------------------------------------------------------------------------------------------------------------------------------------------------------------------------------------------------------------------------------------------------------------------------------------------------------------------------------------------------------------------------------------------------------------------------------------------------------------------------------------------------------------------------------------------------------------------------------------------------------------------------------------------------------------------------------------------------------------------------------------------------------------------------------------|------|-------------------------------------------------------------------------------------------------------------------------------------------------------------------------------------------------------------------------------------------------------------------------------------------------------------------------------------------------------------------------------------------------------------------------------------------------------------------------------------------------------------------------------------------------|----------------------|
| E17.5                | <i>Nes</i> -GFP <sup>+</sup> cells                              | Not associated with <i>Col2.3</i> -Cre <sup>+</sup> cells and chondrocytes                                                                                                                                                                                                                                                                                                                                                                                                                                                                                                                                                                                                                                                                                                                              | 0.1% | Distinction from osteoblastic cells                                                                                                                                                                                                                                                                                                                                                                                                                                                                                                             | (Isern et al., 2014) |
| E18.5                | <i>Nes</i> -GFP <sup>+</sup> cells                              | Frequently associated with arterioles and nascent CD31 <sup>+</sup> endothelial cells within the osteochondral junction; but not with osterix (by antibody staining);                                                                                                                                                                                                                                                                                                                                                                                                                                                                                                                                                                                                                                   | 0.8% | <ul style="list-style-type: none"> <li>▶ Express endogenous <i>Nes</i> mRNAs at this stage</li> <li>▶ CFU-F frequency 6-fold lower than <i>Nes</i>-GFP<sup>+</sup> cells</li> </ul>                                                                                                                                                                                                                                                                                                                                                             | (Isern et al., 2014) |
| E18.5-P1, Peri-natal | <i>Nes</i> -GFP <sup>+</sup> cells                              | <ul style="list-style-type: none"> <li>▶ <i>Nes</i>-GFP<sup>+</sup> cells, likely derived from neural crest</li> <li>▶ Secrete the HSC niche factor <i>Cxcl12</i></li> <li>▶ Distinguished from mesoderm derived “MSCs”</li> <li>▶ Do not generate fetal chondrocytes</li> </ul>                                                                                                                                                                                                                                                                                                                                                                                                                                                                                                                        | 0.2% | <ul style="list-style-type: none"> <li>▶ Perinatal stages: from E18.5 to postnatal day 1 (<a href="http://www.jax.org">www.jax.org</a>)</li> <li>▶ “MSCs” are an incorrect terminology that depicts BM SSCs.</li> </ul>                                                                                                                                                                                                                                                                                                                         | (Isern et al., 2014) |
| E19.5                | <i>Lepr</i> -Cre: dTomato; <i>Col2.3</i> -GFP                   | <i>Lepr</i> -Cre <sup>+</sup> cells were rare and had no contribution to bone development at this stage.                                                                                                                                                                                                                                                                                                                                                                                                                                                                                                                                                                                                                                                                                                | NA   | Used for explicitly identifying osteoblastic bone-lining cells                                                                                                                                                                                                                                                                                                                                                                                                                                                                                  | (Zhou et al., 2014)  |
| P0                   | <i>Nes</i> -GFP <sup>+</sup> cells                              | Belong to BM CD45 <sup>-</sup> /CD31 <sup>-</sup> /Ter119 <sup>-</sup> stromal cells                                                                                                                                                                                                                                                                                                                                                                                                                                                                                                                                                                                                                                                                                                                    | 0.2% | P0, neonatal stage                                                                                                                                                                                                                                                                                                                                                                                                                                                                                                                              | (Isern et al., 2014) |
| P0                   | <i>Nes</i> -GFP <sup>+</sup> /PDGFR $\alpha$ <sup>-</sup> cells | <ul style="list-style-type: none"> <li>▶ <i>Nes</i>-GFP<sup>+</sup> cells are close to HSCs (within 20 <math>\mu</math>m) in the neonatal BM.</li> <li>▶ Express mRNAs (e.g., <i>Sox10</i>, <i>Plp1</i>, <i>ErbB3</i>, and <i>Dhh</i>), typically presented in Schwann cell precursors</li> <li>▶ No <i>Gfap</i> found in mature Schwann cells</li> </ul>                                                                                                                                                                                                                                                                                                                                                                                                                                               | 0.2% | <ul style="list-style-type: none"> <li>▶ Give rise to distinct HSC niche-forming stromal cells <i>in vivo</i></li> <li>▶ Have a high glial differentiation propensity <i>in vitro</i></li> </ul>                                                                                                                                                                                                                                                                                                                                                | (Isern et al., 2014) |
| P0                   | <i>Nes</i> -GFP <sup>+</sup> /PDGFR $\alpha$ <sup>-</sup> cells | <ul style="list-style-type: none"> <li>▶ Enriched mRNA transcripts associated with HSC niche maintenance genes (e.g. <i>Cxcl12</i>, <i>KitL</i>, <i>Angpt1</i>, and <i>Lepr</i>), may have a role in HSC maintenance</li> <li>▶ Have an <i>in vitro</i> mesodermal (adipocyte) differentiation propensity</li> </ul>                                                                                                                                                                                                                                                                                                                                                                                                                                                                                    | 0.2% | <ul style="list-style-type: none"> <li>▶ <i>Nes</i>-GFP<sup>+</sup> cells show physical proximity to the HSC niche.</li> <li>▶ Osteoblastic differentiation genes were selectively inhibited during enforced HSC mobilization or <i>Adrb3</i> activation (Mendez-Ferrer et al. 2010).</li> </ul>                                                                                                                                                                                                                                                | (Isern et al., 2014) |
| P0.5                 | <i>Lepr</i> -Cre: dTomato; <i>Col2.3</i> -GFP                   | <ul style="list-style-type: none"> <li>▶ A drastic increase in the number of <i>Lepr</i>-Cre<sup>+</sup> cells in metaphysis</li> <li>▶ The emergence of few <i>Lepr</i>-Cre<sup>+</sup>/<i>Col2.3</i>-GFP<sup>+</sup> osteoblasts in trabecular bone</li> </ul>                                                                                                                                                                                                                                                                                                                                                                                                                                                                                                                                        | NA   | This probably is the earliest osteogenic contribution made by <i>Lepr</i> -Cre <sup>+</sup> cells, highlighting the 1 <sup>st</sup> plausible postnatal SSC niche at the metaphyseal and trabecular regions.                                                                                                                                                                                                                                                                                                                                    | (Zhou et al., 2014)  |
| P0-P7                | <i>Nes</i> -CreER <sup>T2</sup>                                 | Tamoxifen induction at P0 and chase to P7: highly colocalized with BM <i>Nes</i> -GFP <sup>+</sup> cells                                                                                                                                                                                                                                                                                                                                                                                                                                                                                                                                                                                                                                                                                                | 0.3% | Two transcriptional mechanisms for <i>Nes</i> -GFP are consistent at this stage, suggesting the two reporter systems might share an enhancer complex at the intron 2 of the <i>Nes</i> gene.                                                                                                                                                                                                                                                                                                                                                    | (Isern et al., 2014) |
| P0-P14               | <i>Nes</i> -GFP: <i>Nes</i> -CreER <sup>T2</sup>                | Tamoxifen induction at the neonatal stage (P0): <i>Nes</i> -GFP <sup>+</sup> cells overlap with <i>Nes</i> -CreER <sup>T2</sup> <sup>+</sup> cells.                                                                                                                                                                                                                                                                                                                                                                                                                                                                                                                                                                                                                                                     | 0.3% | It appears that <i>Nes</i> -Cre <sup>+</sup> cells partially overlay with <i>Nes</i> -GFP <sup>+</sup> cells at BM blood vessels, but not in <i>Nes</i> -GFP <sup>+</sup> perivascular pericytes.                                                                                                                                                                                                                                                                                                                                               | (Isern et al., 2014) |
| P3                   | <i>Nes</i> -GFP <sup>+</sup> cells                              | CFU-F activity much lower than <i>Nes</i> -GFP <sup>+</sup> cells                                                                                                                                                                                                                                                                                                                                                                                                                                                                                                                                                                                                                                                                                                                                       | 0.3% | None                                                                                                                                                                                                                                                                                                                                                                                                                                                                                                                                            | (Isern et al., 2014) |
| P3                   | <i>Nes</i> -GFP: <i>Tie2</i> -Cre                               | 94% <i>Nes</i> -GFP <sup>+</sup> / <i>Tie2</i> -Cre <sup>+</sup> /CD45 <sup>-</sup> cells                                                                                                                                                                                                                                                                                                                                                                                                                                                                                                                                                                                                                                                                                                               | NA   | <i>Nes</i> -GFP <sup>+</sup> cells have a role in specifying endothelial cells.                                                                                                                                                                                                                                                                                                                                                                                                                                                                 | (Ono et al., 2014)   |
| P3-P5                | <i>Nes</i> -GFP: <i>Nes</i> -CreER <sup>T2</sup>                | <p>Tamoxifen induction at P3 and chase to P5:</p> <ul style="list-style-type: none"> <li>▶ Almost 100% <i>Nes</i>-GFP<sup>+</sup>/<i>Nes</i>-Cre<sup>+</sup> cells</li> <li>▶ 81% <i>Nes</i>-Cre<sup>+</sup>/CD31<sup>+</sup> cells at the primary spongiosa and BM</li> <li>▶ 34% <i>Nes</i>-GFP<sup>+</sup>/CD31<sup>+</sup> endothelial cells</li> <li>▶ <i>Nes</i>-GFP<sup>+</sup>/<i>Nes</i>-CreER<sup>+</sup> cells also express endogeneous <i>Nes</i> mRNAs and the nestin protein (detected by flow cytometry using ab6142).</li> <li>▶ <i>Nes</i> mRNA (by quantitative PCR) increased by 82-, 263-, and 414-fold in <i>Nes</i>-GFP<sup>+</sup>/<i>Nes</i>-Cre<sup>-</sup>CD31<sup>-</sup>, <i>Nes</i>-GFP<sup>+</sup>/<i>Nes</i>-Cre<sup>+</sup>CD31<sup>+</sup>, and <i>Nes</i>-</li> </ul> | NA   | <ul style="list-style-type: none"> <li>▶ <i>Nes</i>-Cre is inducible at 48 hours after tamoxifen administration</li> <li>▶ Both <i>Nes</i>-GFP<sup>+</sup> and <i>Nes</i>-Cre<sup>+</sup> cells likely share a transcriptional mechanism at this stage.</li> <li>▶ <i>Nes</i>-Cre transcriptional activity is dominant over <i>Nes</i>-GFP in CD31<sup>+</sup> endothelial cells.</li> <li>▶ Additional transcriptional activators from endothelial cells are needed to drive endogenous <i>Nes</i> mRNA expression to a high level.</li> </ul> | (Ono et al., 2014)   |

|                          |                                                                  |                                                                                                                                                                                                                                                                                                                                                                                                                                                                                                                        |            |                                                                                                                                                                                                                             |                          |
|--------------------------|------------------------------------------------------------------|------------------------------------------------------------------------------------------------------------------------------------------------------------------------------------------------------------------------------------------------------------------------------------------------------------------------------------------------------------------------------------------------------------------------------------------------------------------------------------------------------------------------|------------|-----------------------------------------------------------------------------------------------------------------------------------------------------------------------------------------------------------------------------|--------------------------|
|                          |                                                                  | GFP <sup>+</sup> / <i>Nes</i> -Cre <sup>+</sup> , respectively, relative to <i>Nes</i> -GFP negative control                                                                                                                                                                                                                                                                                                                                                                                                           |            |                                                                                                                                                                                                                             |                          |
| P3-P5, P10, P17, P24, 4w | <i>Nes</i> -creER <sup>T2</sup> : Rosa26 tomato: Col1(2.3kb)-GFP | Tamoxifen induction at P3 and chase up to 1 month (4 weeks or 4w):<br>▶ 10% <i>Nes</i> -Cre <sup>+</sup> osteoblasts expressing Col1 at P5<br>▶ <i>Nes</i> -Cre <sup>+</sup> cells increased up to 26% and 23% at P10 and P17 respectively<br>▶ <i>Nes</i> -Cre <sup>+</sup> decreased to 5% and 3% at P24 and 4w respectively                                                                                                                                                                                         | NA         | <i>Nes</i> -Cre <sup>+</sup> cells have limited contribution to osteoblasts at the postnatal stage (within one month).                                                                                                      | (Ono et al., 2014)       |
| P3-P10                   | <i>Nes</i> -GFP: <i>Osx</i> -CreER                               | Tamoxifen induction at P3 and chase to P10: 96% of cells targeted by <i>Osx</i> -CreER were positive for <i>Nes</i> -GFP (i.e. <i>Nes</i> -GFP <sup>+</sup> / <i>Osx</i> -CreER <sup>+</sup> ).                                                                                                                                                                                                                                                                                                                        | NA         | <i>Nes</i> -GFP <sup>+</sup> cells might have a major role in specifying osteoblasts at this stage.                                                                                                                         | (Ono et al., 2014)       |
| P3-P10                   | <i>Nes</i> -GFP: Col1(3.2kb)-CreER                               | Tamoxifen induction at P3 and chase to P10: 92% <i>Nes</i> -GFP <sup>+</sup> /Col1(3.2kb)-CreER <sup>+</sup>                                                                                                                                                                                                                                                                                                                                                                                                           | NA         | The same comment as above                                                                                                                                                                                                   | (Ono et al., 2014)       |
| P3-P10                   | <i>Nes</i> -GFP: <i>Ocn</i> -CreER                               | Tamoxifen induction at P3 and chase to P10: 93% <i>Nes</i> -GFP <sup>+</sup> / <i>Ocn</i> -Cre <sup>+</sup>                                                                                                                                                                                                                                                                                                                                                                                                            | NA         | The same comment as above                                                                                                                                                                                                   | (Ono et al., 2014)       |
| P3-24w                   | <i>Nes</i> -CreER <sup>T2</sup> : Rosa26 tomato                  | Tamoxifen induction at P3 and chase 6 months (24 weeks or 24w):<br>▶ <i>Nes</i> -Cre <sup>+</sup> cells distributed from the BM to the growth plate; 84% <i>Nes</i> -CreER <sup>+</sup> /CD31 <sup>+</sup> cells;<br>▶ <i>Nes</i> -Cre <sup>+</sup> descendant cells form reticular sinusoidal endothelial cells for at least 24 weeks.<br>▶ <i>Nes</i> -Cre <sup>+</sup> cells generate few osteoblasts, osteocytes, and chondrocytes; but no adipocytes                                                              | NA         | In adult BM, <i>Nes</i> -Cre <sup>+</sup> cells mainly contribute to sinusoidal endothelial cells.                                                                                                                          | (Ono et al., 2014)       |
| P5-P6                    | <i>Nes</i> -GFP: iOsx/Tomato                                     | Tamoxifen induction at P5 and chase to P6: ~38% of iOsx <sup>+</sup> cells were <i>Nes</i> -GFP <sup>+</sup> in bone tissues.                                                                                                                                                                                                                                                                                                                                                                                          | NA         | P5-iOsx <sup>+</sup> BM cells exhibit a trilineage differentiation potential.                                                                                                                                               | (Mizoguchi et al., 2014) |
| P5-4w                    | iOsx/Tomato                                                      | Tamoxifen induction at P5: increased CFU-F frequency of sorted iOsx/Tomato <sup>+</sup> cells in the BM stroma harvested at 4 weeks after tamoxifen injection                                                                                                                                                                                                                                                                                                                                                          | 0.5% at 4w | None                                                                                                                                                                                                                        | (Mizoguchi et al., 2014) |
| P5-15w                   | <i>Nes</i> -GFP: iOsx/Tomato;                                    | Tamoxifen induction at P5 and chase to 15w in CD45 <sup>+</sup> /Ter119 <sup>+</sup> /CD31 <sup>+</sup> /iOsx <sup>+</sup> BM stromal cells: 78% <i>Nes</i> -GFP <sup>+</sup> /Lepr <sup>+</sup> (using anti-Lepr), in which 89% of cells were PDGFR $\alpha$ <sup>+</sup> and 83% of cells PDGFR $\beta$ <sup>+</sup>                                                                                                                                                                                                 | NA         | ▶ Regulation of <i>Nes</i> -GFP and <i>Lepr</i> is converged at this stage, apparently for the maturation of bone development.<br>▶ No Western blots used to define the size of the Lepr protein in this and other studies. | (Mizoguchi et al., 2014) |
| P5-15w, 16w, 19w         | <i>Lepr</i> -Cre: <i>Osx</i> -Cre /Tomato                        | <i>Osx</i> -Cre/Tomato mice pulsed at P5 and fracture wound started in 15w-old <i>Lepr</i> -Cre/Tomato mice:<br>▶ Observed freshly made chondrogenic zones of the fracture callus at day 8 (total 16w)<br>▶ No <i>Osx</i> -Cre <sup>+</sup> chondrocytes observed after 3w chase (total 19w)                                                                                                                                                                                                                           | NA         | See comments to P5-32w below.                                                                                                                                                                                               | (Mizoguchi et al., 2014) |
| P5-32w-33w               | <i>Lepr</i> -Cre: <i>Osx</i> -Cre /Tomato                        | <i>Osx</i> -Cre/Tomato mice pulsed at P5 and fracture wound started in 32w-old mice:<br>▶ Some <i>Lepr</i> -Cre <sup>+</sup> cells, identified as Sox9 <sup>+</sup> cells in the fractured callus, contributed to progenitors of osteocytes, chondrocytes, and adipocytes <i>in vivo</i> .<br>▶ <i>Lepr</i> -Cre <sup>+</sup> cells not colocalized well with the Lepr protein in the non-fracture callus region<br>▶ No Lepr protein detected (by an antibody from R&D Systems) in the fracture callus at day 8 (33w) | NA         | These data suggest the Lepr protein is not required for the skeletal repair, thus reinforcing the role of <i>Lepr</i> transcriptomes as pivotal indicators of skeletal development.                                         | (Mizoguchi et al., 2014) |
| P7                       | <i>Nes</i> -GFP <sup>+</sup>                                     | ~2.4-fold decrease in <i>Nes</i> mRNAs relative                                                                                                                                                                                                                                                                                                                                                                                                                                                                        | 0.3%       | Evidence of a dynamic <i>Nes</i>                                                                                                                                                                                            | (Isern et al.,           |

|                  | cells                                | to E18.5                                                                                                                                                                                                                                                                                                                                                                                                                                                                                                                                                                                                                                                                                                                                                                                                                                                                                                                                             |      | transcriptome                                                                                                                                                                                                                                                                                                                                                                                                                                                                                                                                                                                                                                                                  | 2014)                        |
|------------------|--------------------------------------|------------------------------------------------------------------------------------------------------------------------------------------------------------------------------------------------------------------------------------------------------------------------------------------------------------------------------------------------------------------------------------------------------------------------------------------------------------------------------------------------------------------------------------------------------------------------------------------------------------------------------------------------------------------------------------------------------------------------------------------------------------------------------------------------------------------------------------------------------------------------------------------------------------------------------------------------------|------|--------------------------------------------------------------------------------------------------------------------------------------------------------------------------------------------------------------------------------------------------------------------------------------------------------------------------------------------------------------------------------------------------------------------------------------------------------------------------------------------------------------------------------------------------------------------------------------------------------------------------------------------------------------------------------|------------------------------|
| P7               | <i>Lepr-Cre</i> <sup>+</sup> cells   | <ul style="list-style-type: none"> <li>▶ Distributed throughout the BM cavity</li> <li>▶ ~92% <i>Lepr-Cre</i><sup>+</sup> cells also positive for <i>Nes-GFP</i> in the BM</li> <li>▶ Positive for <i>Nes-GFP</i> and <i>Osx-Cre</i> in the primary spongiosa</li> </ul>                                                                                                                                                                                                                                                                                                                                                                                                                                                                                                                                                                                                                                                                             | NA   | The emergence of <i>Lepr-Cre</i> dominance (in the developing bone and BM) coincides with the decrease of <i>Nes-GFP</i> transcriptional activity, suggesting a coordinate regulation between the <i>Lepr</i> and <i>Nes</i> genes.                                                                                                                                                                                                                                                                                                                                                                                                                                            | (Mizoguchi et al., 2014)     |
| P7               | <i>Gfap</i> <sup>+</sup> cells       | Schwann cells expressing <i>Gfap</i> detected in the BM                                                                                                                                                                                                                                                                                                                                                                                                                                                                                                                                                                                                                                                                                                                                                                                                                                                                                              | 0.3% | <i>Gfap</i> : a marker for non-myelin-forming Schwann cells                                                                                                                                                                                                                                                                                                                                                                                                                                                                                                                                                                                                                    | (Isern et al., 2014)         |
| P7               | <i>Nes-GFP</i> :<br><i>Wnt1-Cre2</i> | Increase in <i>Wnt1-Cre2</i> -traced osteochondral cells; partially overlap with <i>Nes-GFP</i> <sup>+</sup> cells, including perivascular <i>Nes-GFP</i> <sup>+</sup> cells                                                                                                                                                                                                                                                                                                                                                                                                                                                                                                                                                                                                                                                                                                                                                                         | 0.3% | <i>Wnt1</i> is not a specific marker for neural crest cells.                                                                                                                                                                                                                                                                                                                                                                                                                                                                                                                                                                                                                   | (Isern et al., 2014)         |
| P7               | <i>Nes-GFP</i>                       | <ul style="list-style-type: none"> <li>▶ <i>Nes-GFP</i><sup>+</sup> cells distributed at the diaphysis and metaphysis (close to the growth plate) in endochondral bones</li> <li>▶ <i>Nes-GFP</i><sup>high</sup> cells traced perivascular cells in the primary spongiosa and pericytes of the arterioles in diaphysis</li> <li>▶ <i>Nes-GFP</i><sup>low</sup> cells in osteoblasts on the bone surface, osteocytes, and endothelial cells</li> </ul>                                                                                                                                                                                                                                                                                                                                                                                                                                                                                                | NA   | See comments on <i>Nes-GFP</i> expression at 8w described by Ono et al., 2014                                                                                                                                                                                                                                                                                                                                                                                                                                                                                                                                                                                                  | (Ono et al., 2014)           |
| P7               | <i>Nes-GFP</i> :<br><i>Lepr-Cre</i>  | 97% <i>Nes-GFP</i> <sup>+</sup> / <i>Lepr-Cre</i> <sup>+</sup> / <i>CD45</i> <sup>-</sup> cells                                                                                                                                                                                                                                                                                                                                                                                                                                                                                                                                                                                                                                                                                                                                                                                                                                                      | NA   | <i>Nes-GFP</i> <sup>+</sup> cells may have a role in specifying <i>Lepr-Cre</i> <sup>+</sup> SSCs.                                                                                                                                                                                                                                                                                                                                                                                                                                                                                                                                                                             | (Ono et al., 2014)           |
| P7               | <i>Nes-GFP</i> :<br><i>Osx-Cre</i>   | 98% <i>Nes-GFP</i> <sup>+</sup> / <i>Osx-Cre</i> <sup>+</sup> / <i>CD45</i> <sup>-</sup> cells                                                                                                                                                                                                                                                                                                                                                                                                                                                                                                                                                                                                                                                                                                                                                                                                                                                       | NA   | <i>Nes-GFP</i> <sup>+</sup> cells are associated with osteoblast development.                                                                                                                                                                                                                                                                                                                                                                                                                                                                                                                                                                                                  | (Ono et al., 2014)           |
| P7 & more stages | <i>Mx1-Cre</i>                       | <ul style="list-style-type: none"> <li>▶ <i>Mx1-Cre</i> labels non-hematopoietic and non-endothelial osteogenic cells in the bone.</li> <li>▶ <i>Mx1-Cre</i><sup>+</sup> cells are highly enriched at the postnatal day 7.</li> <li>▶ <i>Mx1-Cre</i><sup>+</sup> cells are resided at the perivascular niche and enriched in the <i>CD105</i><sup>+</sup>/<i>CD140a</i><sup>+</sup> subset (43%) and calvarial sutures.</li> <li>▶ 59% <i>Nes-GFP</i><sup>+</sup> cells overlap with <i>Mx-1</i><sup>+</sup> cells.</li> <li>▶ <i>Mx1-Cre</i><sup>+</sup> stromal cells are lineage-restricted, essential for supplying new osteoblasts, and for fracture healing <i>in vivo</i>.</li> <li>▶ <i>Mx1-Cre</i><sup>+</sup> cells are clonogenic, having tripotent differentiation potential <i>in vitro</i> and <i>in vivo</i>.</li> <li>▶ <i>Mx1-Cre</i> labels mature osteogenic cells that express osterix, osteopontin, and osteocalcin.</li> </ul> | High | <ul style="list-style-type: none"> <li>▶ <i>Nes-GFP</i><sup>+</sup> cells may be the precursor of <i>Mx1-cre</i><sup>+</sup> cells.</li> <li>▶ <i>Mx1-Cre</i><sup>+</sup> cells may contribute to pre-osteoblasts.</li> <li>▶ No chondrogenesis is required for adult bone fracture repair.</li> <li>▶ <i>Mx1-Cre</i>-labeled cells partially overlap with <i>nestin</i><sup>+</sup> cells detected by an anti-<i>nestin</i> antibody (Millipore, clone rat-401).</li> <li>▶ <i>Mx1-Cre</i> can be used to distinguish long-term osteogenic cells from other bone-forming cells.</li> <li>▶ The osteoblastic turnover rates vary at different developmental stages.</li> </ul> | (Park et al., 2012)          |
| P14              | <i>Nes-GFP</i> <sup>-</sup> cells    | More than 100-fold decrease in CFU-F activity in <i>Nes-GFP</i> <sup>-</sup> BM stromal cells compared with E18.5 cells                                                                                                                                                                                                                                                                                                                                                                                                                                                                                                                                                                                                                                                                                                                                                                                                                              | ~0%  | Unknown mechanisms to regulate this critical transition                                                                                                                                                                                                                                                                                                                                                                                                                                                                                                                                                                                                                        | (Isern et al., 2014)         |
| P21              | <i>Nes-GFP</i> <sup>+</sup> cells    | Maintain steady CFU-F activity                                                                                                                                                                                                                                                                                                                                                                                                                                                                                                                                                                                                                                                                                                                                                                                                                                                                                                                       | 0.3% | None                                                                                                                                                                                                                                                                                                                                                                                                                                                                                                                                                                                                                                                                           | (Isern et al., 2014)         |
| P21              | <i>Lepr-Cre</i> <sup>+</sup> cells   | Distributed throughout the BM cavity, but not on the endosteum                                                                                                                                                                                                                                                                                                                                                                                                                                                                                                                                                                                                                                                                                                                                                                                                                                                                                       | NA   | See comments on <i>Lepr-Cre</i> <sup>+</sup> cells at 15w                                                                                                                                                                                                                                                                                                                                                                                                                                                                                                                                                                                                                      | (Mizoguchi et al., 2014)     |
| P28              | <i>Wnt1-Cre2</i> <sup>+</sup> cells  | CFU-F activity was much higher in <i>Wnt1-Cre2</i> <sup>+</sup> cells than in <i>Wnt1-Cre2</i> <sup>-</sup> BM stromal cells.                                                                                                                                                                                                                                                                                                                                                                                                                                                                                                                                                                                                                                                                                                                                                                                                                        | 0.2% | See above comments.                                                                                                                                                                                                                                                                                                                                                                                                                                                                                                                                                                                                                                                            | (Isern et al., 2014)         |
| 5w               | <i>Nes-GFP</i>                       | <i>Nes-GFP</i> <sup>+</sup> cells clustered, but not colocalized, with <i>osterix</i> <sup>+</sup> cells (by immunostaining) in trabecular bone sections                                                                                                                                                                                                                                                                                                                                                                                                                                                                                                                                                                                                                                                                                                                                                                                             | NA   | None                                                                                                                                                                                                                                                                                                                                                                                                                                                                                                                                                                                                                                                                           | (Mendez-Ferrer et al., 2010) |
| 7w-12w           | <i>Nes-GFP</i> <sup>high</sup> cells | <ul style="list-style-type: none"> <li>▶ Exceptionally low, 0.002% of BM cells</li> <li>▶ Quiescent, only along arterioles</li> <li>▶ <i>NG2</i><sup>+</sup> and <math>\alpha</math>-smooth muscle actin<sup>+</sup></li> </ul>                                                                                                                                                                                                                                                                                                                                                                                                                                                                                                                                                                                                                                                                                                                      | High | <ul style="list-style-type: none"> <li>▶ Likely have an HSC-niche-supporting role</li> <li>▶ Neither <i>Nes-GFP</i><sup>high</sup> nor <i>Nes-</i></li> </ul>                                                                                                                                                                                                                                                                                                                                                                                                                                                                                                                  | (Kunisaki et al., 2013)      |

|         |                                                                     |                                                                                                                                                                                                                                                                                                                                                                          |      |                                                                                                                                                                                              |                           |
|---------|---------------------------------------------------------------------|--------------------------------------------------------------------------------------------------------------------------------------------------------------------------------------------------------------------------------------------------------------------------------------------------------------------------------------------------------------------------|------|----------------------------------------------------------------------------------------------------------------------------------------------------------------------------------------------|---------------------------|
|         |                                                                     | pericytes<br>▶ Physically associated with tyrosine hydroxylase (HT) positive sympathetic nerves and GFAP <sup>+</sup> Schwann cells<br>▶ Do not overlap with <i>Lepr-Cre</i> <sup>+</sup> cells                                                                                                                                                                          |      | GFP <sup>low</sup> BM stromal cells seem to express endogenous <i>Nes</i> mRNAs by microarray (Mendez-Ferrer et al., 2010) and by RNA sequencing (Kunisaki et al., 2013).                    |                           |
| 7w-12w  | <i>Nes-GFP</i> <sup>low</sup> cells                                 | Abundant, reticular in shape, mainly associated with perisinusoids and overlap with <i>Lepr-Cre</i> <sup>+</sup> cells                                                                                                                                                                                                                                                   | Low  | Likely pericytes for SSCs                                                                                                                                                                    | (Kunisaki et al., 2013)   |
| 7w-12w  | <i>Nes-GFP</i> <sup>high</sup> / <i>Lepr-Cre</i> <sup>-</sup> cells | ▶ <i>Nes-GFP</i> <sup>high</sup> / <i>Lepr-cre</i> <sup>-</sup> cells express the highest level of <i>Scf</i> and <i>Cxcl12</i> .<br>▶ RNA-seq data showed that <i>Nes-GFP</i> <sup>high</sup> / <i>Lepr-cre</i> <sup>-</sup> cells were negative for <i>Nes</i> and positive for <i>Lepr</i> expression (GSE48764).                                                     | NA   | ▶ Discrepancy between transcriptome and transcriptional activity<br>▶ Evidence of a putative inverse regulation between the <i>Nes</i> and <i>Lepr</i> genes                                 | (Kunisaki et al., 2013)   |
| 7w-12w  | <i>Nes-GFP</i> :<br><i>NG2-CreER</i>                                | <i>Nes-GFP</i> <sup>high</sup> cells (~30%), not <i>Nes-GFP</i> <sup>low</sup> cells, colocalized with <i>NG2-Cre</i> <sup>+</sup> cells                                                                                                                                                                                                                                 | NA   | None                                                                                                                                                                                         | (Kunisaki et al., 2013)   |
| 7w-12w  | <i>NG2-CreER</i> :<br>iDTR                                          | ▶ Tamoxifen induction and diphtheria toxin treatment depleted ~55% of <i>Nes-GFP</i> <sup>high</sup> cells.<br>▶ Depletion of <i>NG2</i> <sup>+</sup> cells expelled quiescent HSCs from arteriolar to perisinusoidal niches.                                                                                                                                            | NA   | <i>NG2-Cre</i> <sup>+</sup> cells are believed to be part of HSC niches, which endorses HSC for quiescence.                                                                                  | (Kunisaki et al., 2013)   |
| 8w      | <i>Nes-GFP</i>                                                      | In endochondral bones:<br>▶ <i>Nes-GFP</i> <sup>high</sup> cells were decreased in the primary spongiosa and BM.<br>▶ <i>Nes-GFP</i> <sup>low</sup> cells were further decreased in osteoblasts (on bone surfaces), osteocytes, but still observable at this stage.                                                                                                      | NA   | From P7 to 8w, <i>Nes-GFP</i> <sup>high/low</sup> cells continue to decrease without a conclusive mechanism.                                                                                 | (Ono et al., 2014)        |
| 8w      | <i>Lepr-Cre</i> <sup>+</sup> / <i>Col2.3-GFP</i> <sup>-</sup>       | <i>Lepr-Cre</i> <sup>+</sup> / <i>Col2.3-GFP</i> <sup>-</sup> / <i>CD45</i> <sup>-</sup> / <i>Ter119</i> <sup>-</sup> / <i>CD31</i> <sup>-</sup> BM cells<br>▶ Cell frequency stabilized near 0.2%<br>▶ Quiescent at 8w, reactivable under stress conditions<br>▶ Intrafemoral injection of 500 of these cells generated adipocytes, osteocytes, and chondrocytes at 4w. | NA   | These data suggest that <i>Lepr-Cre</i> <sup>+</sup> / <i>Col2.3-GFP</i> <sup>-</sup> cells are a progenitor cell source for adipocytes and osteolineage cells.                              | (Zhou et al., 2014)       |
| 8w      | <i>Nes-CreER</i> <sup>T2</sup> :<br><i>Scf</i> <sup>fl/-</sup>      | Deletion of <i>Scf</i> from <i>Nes-Cre</i> <sup>+</sup> cells did not affect HSC frequency in BM.                                                                                                                                                                                                                                                                        | NA   | HSC niche maintenance does not require SCF from <i>Nes-Cre</i> <sup>+</sup> cells.                                                                                                           | (Ding and Morrison, 2013) |
| 8w      | <i>Nes-GFP</i>                                                      | <i>Nes-GFP</i> <sup>high</sup> along larger vessels in BM; <i>Nes-GFP</i> <sup>low</sup> in perisinusoidal stromal cells similar to <i>Scf-GFP</i> <sup>+</sup> cells                                                                                                                                                                                                    | NA   | <i>Nes-GFP</i> expression patterns in this study are consistent with the report by Mendez-Ferrer et al. 2010.                                                                                | (Ding and Morrison, 2013) |
| 8w      | <i>Nes-Cre</i> <sup>+</sup> cells                                   | Only found around larger blood vessels in BM                                                                                                                                                                                                                                                                                                                             | NA   | <i>Nes</i> expression discrepancies                                                                                                                                                          | (Ding and Morrison, 2013) |
| 8w      | <i>Nes-Cherry</i> :<br><i>Nes-GFP</i>                               | <i>Nes-Cherry</i> <sup>+</sup> cells were around larger vessels but not around sinusoids, whereas <i>Nes-GFP</i> <sup>+</sup> cells were detected around both regions.                                                                                                                                                                                                   | NA   | <i>Nes-Cherry</i> has a similar expression pattern to that of <i>Nes-Cre</i> . However, the detail information about <i>Nes-Cherry</i> mice is not available.                                | (Ding and Morrison, 2013) |
| 8w (2m) | <i>Lepr-Cre</i> :<br>dTomato:<br><i>Col2.3-GFP</i>                  | <i>Lepr-Cre</i> <sup>+</sup> cells were filled with metaphysis and diaphysis of the BM,                                                                                                                                                                                                                                                                                  | NA   | The emergence of 3-10% <i>Lepr-Cre</i> <sup>+</sup> / <i>Col2.3-GFP</i> <sup>+</sup> osteoblasts in bone                                                                                     | (Zhou et al., 2014)       |
| 8w-16w  | <i>Wnt1-CreER</i>                                                   | <i>Wnt1-CreER</i> <sup>+</sup> / <i>CD45</i> <sup>-</sup> / <i>Ter119</i> <sup>-</sup> BM stromal cells                                                                                                                                                                                                                                                                  | 0.5% | <i>Wnt1-Cre</i> <sup>+</sup> neural crest derivatives minimally contribute to CFU-F colonies at this stage.                                                                                  | (Zhou et al., 2014)       |
| 8w-12w  | <i>Nes-GFP</i> :<br><i>Lepr</i>                                     | 70% of <i>Lepr</i> <sup>+</sup> cells (by flow cytometric analysis) in BM mainly overlap with <i>Nes-GFP</i> <sup>+</sup> cells.                                                                                                                                                                                                                                         | NA   | None                                                                                                                                                                                         | (Pinho et al., 2013)      |
| 8w-12w  | <i>PDGFR</i> $\alpha$ <sup>+</sup> / <i>CD51</i> <sup>+</sup>       | <i>PDGFR</i> $\alpha$ <sup>+</sup> / <i>CD51</i> <sup>+</sup> cells represent a small subset of <i>Nes-GFP</i> <sup>+</sup> cells. <i>Nes</i> mRNAs are expressed in this cell population.                                                                                                                                                                               | NA   | Expression of <i>CD51</i> (the integrin subunit $\alpha$ V) enhances <i>Nes</i> mRNA expression and might enable to convert <i>Nes-GFP</i> <sup>+</sup> / <i>PDGFR</i> $\alpha$ <sup>+</sup> | (Pinho et al., 2013)      |

|        |                                                          |                                                                                                                                                                                                                                                                                                                                                                                                                                         |      |                                                                                                                                                                                                                                                                                        |                     |
|--------|----------------------------------------------------------|-----------------------------------------------------------------------------------------------------------------------------------------------------------------------------------------------------------------------------------------------------------------------------------------------------------------------------------------------------------------------------------------------------------------------------------------|------|----------------------------------------------------------------------------------------------------------------------------------------------------------------------------------------------------------------------------------------------------------------------------------------|---------------------|
|        |                                                          |                                                                                                                                                                                                                                                                                                                                                                                                                                         |      | /CD146 <sup>+</sup> cells into perivascular pericytes.                                                                                                                                                                                                                                 |                     |
| 8w-12w | $\alpha$ -catulin-GFP <sup>+</sup> cells                 | <ul style="list-style-type: none"> <li>▶ Represent 0.02% of BM hematopoietic cells, located at the central perisinusoids</li> <li>▶ Restricted to HSC niche cells, adjacent to <i>Lepr</i><sup>+</sup> and <i>Cxcl12</i><sup>+</sup> cells,</li> <li>▶ Distant from arterioles and endosteal surface</li> <li>▶ HSCs located within the 10 <math>\mu</math>m sinusoidal vessels with an HSC frequency of 1/6</li> </ul>                 | NA   | These data are inconsistent with periarteriolar HSC-niches supported by <i>NG2</i> -CreER <sup>+</sup> cells in a previous report (Kunisaki et al. 2013).                                                                                                                              | (Acar et al., 2015) |
| 8w-12w | Gfap <sup>+</sup> cells                                  | Gfap <sup>+</sup> non-myelinating Schwann cells associated with nerve fibers tend to localize in the central BM.                                                                                                                                                                                                                                                                                                                        | NA   | Indirect evidence of an HSC-niche supporting role by neural crest lineage cells                                                                                                                                                                                                        | (Acar et al., 2015) |
| 8w-12w | <i>NG2</i> -CreER <sup>+</sup> cells                     | <ul style="list-style-type: none"> <li>▶ Not detected in <i>Scf</i>-GFP<sup>+</sup> or <i>Cxcl12</i>-DsRed<sup>+</sup> cells</li> <li>▶ <i>NG2</i>-CreER mediated conditional deletion of <i>Scf</i> in <i>Scf</i><sup>GFP/fl</sup> mice or <i>Cxcl12</i> in <i>NG2</i>-CreER: <i>Cxcl12</i><sup>-fl</sup> mice did not affect HSC frequency.</li> </ul>                                                                                | NA   | <i>Nes</i> -Cre mediated deletion of <i>Scf</i> also shows no effects on HSC function (Ding et al. 2012).                                                                                                                                                                              | (Acar et al., 2015) |
| 8w-12w | HSCs                                                     | Higher HSC density, marked by $\alpha$ -catulin-GFP <sup>+</sup> /c-kit <sup>+</sup> , found in the diaphysis than in metaphysis                                                                                                                                                                                                                                                                                                        | NA   | An unexpected result that might provide insights into HSC niche dynamics                                                                                                                                                                                                               | (Acar et al., 2015) |
| 8w-16w | BM stromal cells                                         | CD45 <sup>+</sup> /Ter119 <sup>-</sup> non-hematopoietic BM cells                                                                                                                                                                                                                                                                                                                                                                       | 1.4% | None                                                                                                                                                                                                                                                                                   | (Zhou et al., 2014) |
| 8w-16w | PDFFR $\alpha$ <sup>+</sup>                              | PDGFR $\alpha$ <sup>+</sup> /CD45 <sup>-</sup> /Ter119 <sup>-</sup> BM stromal cells                                                                                                                                                                                                                                                                                                                                                    | 10%  | None                                                                                                                                                                                                                                                                                   | (Zhou et al., 2014) |
| 8w-16w | PDFFR $\alpha$ <sup>+</sup> /Sca-1 <sup>+</sup>          | The PDGFR $\alpha$ <sup>+</sup> /Sca-1 <sup>+</sup> /CD45 <sup>-</sup> /Ter119 <sup>-</sup> cell population                                                                                                                                                                                                                                                                                                                             | 16%  | Reside mainly around arterioles, but does not express the HSC niche factor <i>Cxcl12</i>                                                                                                                                                                                               | (Zhou et al., 2014) |
| 8w-16w | PDFFR $\alpha$ <sup>+</sup> /Sca-1 <sup>-</sup>          | The PDGFR $\alpha$ <sup>+</sup> /Sca-1 <sup>-</sup> /CD45 <sup>-</sup> /Ter119 <sup>-</sup> cell population, known as CXCL12-abundant reticular (CAR) cells                                                                                                                                                                                                                                                                             | 8%   | Exist primarily around sinusoids and express high levels of <i>Cxcl12</i>                                                                                                                                                                                                              | (Zhou et al., 2014) |
| 8w-16w | <i>Lepr</i> -Cre/Tomato <sup>+</sup> /CD105 <sup>+</sup> | <ul style="list-style-type: none"> <li>▶ 0.3% <i>Lepr</i>-Cre<sup>+</sup>/CD45<sup>-</sup>/Ter119<sup>-</sup> cells</li> <li>▶ 98% PDFFR<math>\alpha</math><sup>+</sup>, 98% CD51<sup>+</sup>, 69% CD105<sup>+</sup></li> <li>▶ Around sinusoids and arterioles</li> <li>▶ High levels of <i>Lepr</i> mRNAs</li> <li>▶ The <i>Lepr</i> protein detected by immunostaining</li> <li>▶ Considered as a major source of BM SSCs</li> </ul> | 14%  | <ul style="list-style-type: none"> <li>▶ Tripotent cells from 9% of CFU-F colonies</li> <li>▶ Ossicles from 30% CFC-F colonies</li> <li>▶ CD105, known as endoglin, a plasma membrane and extracellular glycoprotein of vascular endothelial cells, used as an "MSC" marker</li> </ul> | (Zhou et al., 2014) |
| 8w-16w | <i>Lepr</i> -Cre/Tomato <sup>-</sup> /CD105 <sup>-</sup> | <i>Lepr</i> -Cre/Tomato <sup>-</sup> /CD105 <sup>-</sup> /CD45 <sup>-</sup> /Ter119 <sup>-</sup> BM stromal cells                                                                                                                                                                                                                                                                                                                       | 1%   | 14-fold decrease in CFU-F colonies compared with <i>Lepr</i> -Cre/Tomato <sup>+</sup> /CD105 <sup>+</sup> cells                                                                                                                                                                        | (Zhou et al., 2014) |
| 8w-16w | <i>Lepr</i> -Cre/Tomato <sup>+</sup>                     | <i>Lepr</i> -Cre/Tomato <sup>+</sup> /CD45 <sup>-</sup> /Ter119 <sup>-</sup> BM stromal cells                                                                                                                                                                                                                                                                                                                                           | 11%  | Around sinusoids and arterioles                                                                                                                                                                                                                                                        | (Zhou et al., 2014) |
| 8w-16w | <i>Lepr</i> -Cre/Tomato <sup>-</sup>                     | <i>Lepr</i> -Cre/Tomato <sup>-</sup> /CD45 <sup>-</sup> /Ter119 <sup>-</sup> BM stromal cells                                                                                                                                                                                                                                                                                                                                           | 0.1% | Depletion of CFU-F capacity                                                                                                                                                                                                                                                            | (Zhou et al., 2014) |
| 8w-16w | <i>Lepr</i> -Cre <sup>+</sup> /Scf-GFP <sup>+</sup>      | <i>Lepr</i> -Cre/Tomato <sup>+</sup> /Scf-GFP <sup>+</sup> /CD45 <sup>-</sup> /Ter119 <sup>-</sup> BM stromal cells                                                                                                                                                                                                                                                                                                                     | NA   | Around sinusoids only                                                                                                                                                                                                                                                                  | (Zhou et al., 2014) |
| 8w-16w | <i>Prx1</i> -Cre/Tomato <sup>+</sup>                     | <i>Prx1</i> -Cre/Tomato <sup>+</sup> /CD45 <sup>-</sup> /Ter119 <sup>-</sup> BM stromal cells                                                                                                                                                                                                                                                                                                                                           | 10%  | A positive marker for BM stromal cells, tightly associated with <i>Lepr</i> -Cre                                                                                                                                                                                                       | (Zhou et al., 2014) |
| 8w-16w | <i>Scf</i> -GFP <sup>+</sup>                             | <i>Scf</i> -GFP <sup>+</sup> /CD45 <sup>-</sup> /Ter119 <sup>-</sup> BM stromal cells                                                                                                                                                                                                                                                                                                                                                   | 10%  | A positive marker for BM stromal cells                                                                                                                                                                                                                                                 | (Zhou et al., 2014) |
| 8w-16w | <i>Cxcl12</i> -DsRed <sup>high</sup>                     | <i>Cxcl12</i> -DsRed <sup>high</sup> /CD45 <sup>-</sup> /Ter119 <sup>-</sup> BM stromal cells                                                                                                                                                                                                                                                                                                                                           | 12%  | A positive marker for BM stromal cells                                                                                                                                                                                                                                                 | (Zhou et al., 2014) |
| 8w-16w | <i>Nes</i> -GFP <sup>low</sup>                           | <i>Nes</i> -GFP <sup>low</sup> /CD45 <sup>-</sup> /Ter119 <sup>-</sup> BM stromal cells                                                                                                                                                                                                                                                                                                                                                 | 8%   | A positive marker for BM stromal cells                                                                                                                                                                                                                                                 | (Zhou et al., 2014) |
| 8w-16w | <i>Nes</i> -GFP <sup>high</sup>                          | <i>Nes</i> -GFP <sup>high</sup> /CD45 <sup>-</sup> /Ter119 <sup>-</sup> BM stromal cells                                                                                                                                                                                                                                                                                                                                                | 3%   | See comments on <i>NG2</i> -CreER <sup>+</sup> cells                                                                                                                                                                                                                                   | (Zhou et al., 2014) |
| 8w-16w | <i>Nes</i> -CreER <sup>+</sup>                           | <i>Nes</i> -CreER <sup>+</sup> /CD45 <sup>-</sup> /Ter119 <sup>-</sup> BM stromal cells                                                                                                                                                                                                                                                                                                                                                 | 0    | A negative marker for BM stromal cells                                                                                                                                                                                                                                                 | (Zhou et al., 2014) |

|                     |                                       |                                                                                                                                                                                                                                     |     |                                                                                                                                                                               |                              |
|---------------------|---------------------------------------|-------------------------------------------------------------------------------------------------------------------------------------------------------------------------------------------------------------------------------------|-----|-------------------------------------------------------------------------------------------------------------------------------------------------------------------------------|------------------------------|
| 8w-16w              | NG2-CreER <sup>+</sup>                | NG2-CreER <sup>+</sup> /CD45 <sup>-</sup> /Ter119 <sup>-</sup> BM stromal cells                                                                                                                                                     | 2%  | NG2-Cre <sup>+</sup> and Nes-GFP <sup>+</sup> cells show similar low CFU-F activity.                                                                                          | (Zhou et al., 2014)          |
| 8w-16w              | Mx1-CreER <sup>+</sup>                | Mx1-CreER <sup>+</sup> /CD45 <sup>-</sup> /Ter119 <sup>-</sup> BM stromal cells                                                                                                                                                     | 2%  | Mx1-Cre seems a weaker marker for osteoblastic lineage at this stage.                                                                                                         | (Zhou et al., 2014)          |
| 12w-16w             | Prx1-Cre;<br>Jak2 <sup>V617F</sup>    | ► Jak2 mutant cells had a 3-fold decrease in CFU-F activity compared with the wild-type cells.<br>► Increase in adipocytes                                                                                                          | Low | Genetic evidence indicates Jak2/Stat3 is underlying the regulation of both adipogenesis and osteogenesis.                                                                     | (Yue et al., 2016)           |
| 12w-16w             | Nes-creER <sup>T2</sup> :<br>RCE-loxP | Pulsed with tamoxifen at 3 months and chased for 4w (1 month): No Nes-Cre <sup>+</sup> osteoblasts, osteocytes, and chondrocytes (collagen $\alpha$ 1 type 2 <sup>+</sup> )                                                         | NA  | Nes-Cre mediates slow turnover of osteolineage cells.                                                                                                                         | (Mendez-Ferrer et al., 2010) |
| 12w-44w             | Nes-creER <sup>T2</sup> :<br>RCE-loxP | Pulsed with tamoxifen at 3 months (12w) and chased for 8 months (44w): see GFP <sup>+</sup> osteoblasts, osteocytes, and chondrocytes (collagen $\alpha$ 1 type 2 <sup>+</sup> )                                                    | NA  | Adult Nes-Cre <sup>+</sup> cells are likely an SSC source.                                                                                                                    | (Mendez-Ferrer et al., 2010) |
| 15w                 | Lepr-Cre <sup>+</sup> cells           | Distributed not only in the BM cavity, but also along the cortical bone as Lepr-Cre <sup>+</sup> /Ocn <sup>+</sup> /DMP1 <sup>+</sup> osteoblasts and osteocytes                                                                    | NA  | This study suggests a migration route of Lepr-Cre <sup>+</sup> cells during osteogenesis: BM cavity → endosteum → trabecular bone → cortical bone.                            | (Mizoguchi et al., 2014)     |
| 24w                 | Prx1-Cre<br>/Lepr <sup>fl/fl</sup>    | Conditional deletion of Lepr in SSCs: increased osteogenesis and down-regulated adipogenesis                                                                                                                                        | NA  | The Lepr protein is likely an inhibitor of adult osteogenesis.                                                                                                                | (Yue et al., 2016)           |
| 24w,<br>40w,<br>56w | Lepr-Cre:<br>dTomato:<br>Col2.3-GFP   | Age-dependent contribution of Lepr-Cre <sup>+</sup> cells to bone development:<br>24w: 10%–23% of Col2.3-GFP <sup>+</sup> cells,<br>40w: 43%–67% of Col2.3-GFP <sup>+</sup> cells,<br>56w: 61%–81% of Col2.3-GFP <sup>+</sup> cells | NA  | Accordingly, no Lepr protein expression was detected by IF (at 10w or 40w), which suggests that Lepr-Cre functions as an independent transcriptional reporter in these stages | (Zhou et al., 2014)          |

## ABBREVIATIONS:

Adrb3,  $\beta$ 3 adrenoreceptor; BM, bone marrow; CFU-F, Colony forming unit-fibroblastic, an assay based on freshly isolated single cells from an intact tissue, in which single cells are able to initiate clonal growth of fibroblastic cells at low density; Col1, collagen I; DMP1, dentin matrix protein 1; HSC, hematopoietic stem cell; iDTA, diphtheria toxin; iDTAR, diphtheria toxin receptor; IF, immunofluorescence; m, month(s); MSC, “mesenchymal stem cells”; NA, not available; Nes-CreER<sup>T2</sup>, tamoxifen-inducible transgenic mouse described by Balordi and Fishell (2007); Ocn, osteocalcin; Osx, osterix; POC, primary ossification center; SSC, skeletal stem cell; Tripotent: osteochondrogenic, osteogenic, and adipogenic; wk, week

## REREFERNCES

Acar, M., Kocherlakota, K.S., Murphy, M.M., Peyer, J.G., Oguro, H., Inra, C.N., Jaiyeola, C., Zhao, Z., Luby-Phelps, K., and Morrison, S.J. (2015). Deep imaging of bone marrow shows non-dividing stem cells are mainly perisinusoidal. *Nature* 526, 126-130.

Balordi, F., and Fishell, G. (2007). Mosaic removal of hedgehog signaling in the adult SVZ reveals that the residual wild-type stem cells have a limited capacity for self-renewal. *J Neurosci* 27, 14248-59.

Ding, L., and Morrison, S.J. (2013). Haematopoietic stem cells and early lymphoid progenitors occupy distinct bone marrow niches. *Nature* 495, 231-235.

Isern, J., García-García, A., Martín, A.M., Arranz, L., Martín-Pérez, D., Torroja, C., Sánchez-Cabo, F., Méndez-Ferrer, S. (2014). The neural crest is a source of mesenchymal stem cells with specialized hematopoietic stem cell niche function. *Elife* 25; 3:e03696.

Kunisaki, Y., Bruns, I., Scheiermann, C., Ahmed, J., Pinho, S., Zhang, D., Mizoguchi, T., Wei, Q., Lucas, D., Ito, K., et al. (2013). Arteriolar niches maintain haematopoietic stem cell quiescence. *Nature* 502, 637-643.

Mendez-Ferrer, S., Michurina, T.V., Ferraro, F., Mazloom, A.R., Macarthur, B.D., Lira, S.A., Scadden, D.T., Ma'ayan, A., Enikolopov, G.N., and Frenette, P.S. (2010). Mesenchymal and haematopoietic stem cells form a unique bone marrow niche. *Nature* 466, 829-834.

Mizoguchi, T., Pinho, S., Ahmed, J., Kunisaki, Y., Hanoun, M., Mendelson, A., Ono, N., Kronenberg, H.M., and Frenette, P.S. (2014). Osterix marks distinct waves of primitive and definitive stromal progenitors during bone marrow development. *Dev Cell* 29, 340-349.

Ono, N., Ono, W., Mizoguchi, T., Nagasawa, T., Frenette, P.S., and Kronenberg, H.M. (2014). Vasculature-associated cells expressing nestin in developing bones encompass early cells in the osteoblast and endothelial lineage. *Dev Cell* 29, 330-339.

Park, D., Spencer, J.A., Koh, B.I., Kobayashi, T., Fujisaki, J., Clemens, T.L., Lin, C.P., Kronenberg, H.M., and Scadden, D.T. (2012). Endogenous bone marrow MSCs are dynamic, fate-restricted participants in bone maintenance and regeneration. *Cell Stem Cell* 10, 259-72.

Pinho, S., Lacombe, J., Hanoun, M., Mizoguchi, T., Bruns, I., Kunisaki, Y., and Frenette, P.S. (2013). PDGFRalpha and CD51 mark human nestin+ sphere-forming mesenchymal stem cells capable of hematopoietic progenitor cell expansion. *J Exp Med* 210, 1351-1367.

Yue, R., Zhou, B.O., Shimada, I.S., Zhao, Z., and Morrison, S.J. (2016). Leptin Receptor Promotes Adipogenesis and Reduces Osteogenesis by Regulating Mesenchymal Stromal Cells in Adult Bone Marrow. *Cell Stem Cell* 18, 782-796.

Zhou, B.O., Yue, R., Murphy, M.M., Peyer, J.G., and Morrison, S.J. (2014). Leptin-receptor-expressing mesenchymal stromal cells represent the main source of bone formed by adult bone marrow. *Cell Stem Cell* 15, 154-168.
